# Supplementary material
Source: PubMed Central journal article supplement (PMC5826779)
Supplement: NIHMS917721-supplement-supplement_1.pdf [file NIHMS917721-supplement-supplement_1.pdf]

**Supplemental Table S1.** Multivariable logistic regression model coefficients

| Baseline covariates | Outcome of CKD stage 3 <sup>a</sup> |      |         | Outcome of CKD stage 4 <sup>a</sup> |      |         | Outcome of CKD stage 5 <sup>a</sup> or ESRD |      |         |
|---------------------|-------------------------------------|------|---------|-------------------------------------|------|---------|---------------------------------------------|------|---------|
|                     | $\beta$                             | S.D. | P value | $\beta$                             | S.D. | P value | $\beta$                                     | S.D. | P value |
| htTKV <sup>b</sup>  | 0.32                                | 0.08 | <0.001  | 0.35                                | 0.07 | <0.001  | 0.30                                        | 0.07 | <0.001  |
| Age                 | 0.06                                | 0.02 | 0.015   | 0.05                                | 0.03 | 0.086   | 0.04                                        | 0.03 | 0.193   |
| BMI                 | 0.03                                | 0.04 | 0.452   | 0.05                                | 0.04 | 0.164   | 0.04                                        | 0.04 | 0.401   |
| Sex <sup>c</sup>    | 0.35                                | 0.39 | 0.367   | -0.14                               | 0.43 | 0.754   | -0.35                                       | 0.46 | 0.450   |
| Race <sup>d</sup>   | 0.23                                | 0.59 | 0.692   | 0.88                                | 1.01 | 0.382   | 0.19                                        | 0.96 | 0.846   |
| GFR <sup>e</sup>    | -0.03                               | 0.01 | 0.003   | -0.03                               | 0.01 | 0.015   | -0.03                                       | 0.01 | 0.029   |
| Intercept           | -1.74                               | 1.83 | 0.253   | -4.29                               | 2.31 | 0.064   | -3.10                                       | 2.41 | 0.275   |

<sup>a</sup>Defined by iothalamate GFR

<sup>b</sup>Per 100 mL/m

<sup>c</sup>Reference group is male

<sup>d</sup>Reference group is non-white

<sup>e</sup>Baseline corrected iothalamate GFR (mL/min/1.73 m<sup>2</sup>)

**Supplemental Table S2.** Logistic regression analysis with different adjustments to the original cohort

| Renal insufficiency endpoint by measured (iothalamate) GFR | Full cohort <sup>a</sup> |      |              | Class I patients only <sup>b</sup> |      |             |
|------------------------------------------------------------|--------------------------|------|--------------|------------------------------------|------|-------------|
|                                                            | N                        | OR   | 95% CI       | N                                  | OR   | 95% CI      |
| 30–59 (CKD Stage 3)                                        | 184                      | 1.38 | (1.19-1.60)  | 180                                | 1.58 | (1.31-1.92) |
| 15-29 (CKD Stage 4)                                        | 189                      | 1.35 | (1.19, 1.54) | 185                                | 1.42 | (1.23-1.64) |
| <15 (CKD Stage 5) or ESRD                                  | 186                      | 1.30 | (1.15, 1.48) | 182                                | 1.34 | (1.17-1.54) |
| GFR decreased $\geq$ 30%                                   | 192                      | 1.42 | (1.20, 1.67) | 188                                | 1.54 | (1.27-1.88) |
| GFR decreased $\geq$ 57%                                   | 188                      | 1.36 | (1.20 1.54)  | 184                                | 1.47 | (1.27-1.71) |

GFR values in mL/min/1.73 m<sup>2</sup>

P values are <0.001 for all the analyses

OR, odds ratio of reaching CKD stage per 100 mL/m increment in baseline htTKV in multivariable model adjusted for age, sex, race, BMI and baseline GFR

<sup>a</sup>12 patients with CKD stage 3 at baseline were considered part of the cohort for the analysis of CKD Stage 4, CKD Stage 5, GFR decreased  $\geq$  30% and GFR decreased  $\geq$  57%, and were included if they were informative of the outcome

<sup>b</sup>Excluded 4 patients with atypical (Class 2) imaging findings on kidney MRI

**Supplemental Table S3.** Logistic regression analysis with adjustments to the original cohort to exclude participants in interventional trials

| Renal insufficiency endpoint by measured (iothalamate) GFR | Full cohort <sup>a</sup> |      |              | Excluding HALT subjects <sup>b</sup> |      |             | Excluding TEMPO subjects <sup>c</sup> |      |             |
|------------------------------------------------------------|--------------------------|------|--------------|--------------------------------------|------|-------------|---------------------------------------|------|-------------|
|                                                            | N                        | OR   | 95% CI       | N                                    | OR   | 95% CI      | N                                     | OR   | 95% CI      |
| 30–59 (CKD Stage 3)                                        | 184                      | 1.38 | (1.19-1.60)  | 125                                  | 1.32 | (1.12-1.55) | 162                                   | 1.40 | (1.19-1.66) |
| 15-29 (CKD Stage 4)                                        | 189                      | 1.35 | (1.19, 1.54) | 130                                  | 1.30 | (1.12-1.51) | 166                                   | 1.37 | (1.19-1.58) |
| <15 (CKD Stage 5) or ESRD                                  | 186                      | 1.30 | (1.15, 1.48) | 128                                  | 1.28 | (1.11-1.49) | 164                                   | 1.28 | (1.13-1.46) |
| GFR decreased ≥ 30%                                        | 192                      | 1.42 | (1.20, 1.67) | 133                                  | 1.32 | (1.11-1.60) | 168                                   | 1.42 | (1.18-1.70) |
| GFR decreased ≥ 57%                                        | 188                      | 1.36 | (1.20 1.54)  | 129                                  | 1.33 | (1.15-1.54) | 166                                   | 1.36 | (1.18-1.55) |

GFR values in mL/min/1.73 m<sup>2</sup>

P values are ≤0.001 for all the analyses except P = 0.003 for GFR decreased ≥ 30% in the cohort excluding HALT subjects.

OR, odds ratio of reaching CKD stage per 100 mL/m increment in baseline htTKV in multivariable model adjusted for age, sex, race, BMI and baseline GFR

<sup>a</sup>12 patients with CKD stage 3 at baseline were considered part of the cohort for the analysis of CKD Stage 4, CKD Stage 5, GFR decreased ≥ 30% and GFR decreased ≥ 57%, and were included if they were informative of the outcome

<sup>b</sup> Exclude subjects in HALT trial

<sup>c</sup> Exclude subjects in TEMPO trial

**Supplemental Table S4.** P values for likelihood ratio tests comparing models that include ADPKD genotype and/or htTKV

| Model comparison    | Outcome     |             |                     |                           |                           |
|---------------------|-------------|-------------|---------------------|---------------------------|---------------------------|
|                     | CKD Stage 3 | CKD Stage 4 | CKD Stage 5 or ESRD | GFR decreased $\geq 30\%$ | GFR decreased $\geq 57\%$ |
| Model 2 vs. Model 1 | 0.012       | 0.004       | 0.008               | <0.001                    | 0.005                     |
| Model 3 vs. Model 1 | <0.001      | <0.001      | <0.001              | <0.001                    | <0.001                    |
| Model 4 vs. Model 1 | <0.001      | <0.001      | <0.001              | <0.001                    | <0.001                    |
| Model 4 vs. Model 2 | <0.001      | <0.001      | <0.001              | <0.001                    | <0.001                    |
| Model 4 vs. Model 3 | 0.396       | 0.308       | 0.275               | 0.133                     | 0.482                     |

Model 1 (Base model): Sex, race, BMI, baseline age and GFR

Model 2: Base model + genotype

Model 3: Base model + htTKV

Model 4: Base model + genotype + htTKV

**Supplemental Table S5.** Net reclassification indices for models that include ADPKD genotype and/or htTKV

| Model comparison    | Outcome                  |                          |                          |                           |                          |
|---------------------|--------------------------|--------------------------|--------------------------|---------------------------|--------------------------|
|                     | CKD Stage 3              | CKD Stage 4              | CKD Stage 5 or ESRD      | GFR decreased $\geq$ 30%  | GFR decreased $\geq$ 57% |
| Model 2 vs. Model 1 | 0.004                    | 0.083                    | 0.079                    | 0.183                     | 0.109                    |
| Model 3 vs. Model 1 | 0.202<br>( 0.018, 0.425) | 0.249<br>( 0.077, 0.493) | 0.218<br>( 0.015, 0.500) | 0.308<br>( 0.099, 0.607)  | 0.303<br>( 0.113, 0.545) |
| Model 4 vs. Model 1 | 0.205<br>( 0.056, 0.462) | 0.245<br>( 0.089, 0.522) | 0.250<br>( 0.050, 0.537) | 0.381<br>( 0.148, 0.655)  | 0.307<br>( 0.128, 0.582) |
| Model 4 vs. Model 2 | 0.189<br>( 0.002, 0.401) | 0.150<br>( 0.008, 0.444) | 0.200<br>(-0.037, 0.349) | 0.238<br>( 0.014, 0.482)  | 0.268<br>( 0.078, 0.488) |
| Model 4 vs. Model 3 | 0.094<br>(-0.066, 0.183) | 0.055<br>(-0.070, 0.228) | 0.050<br>(-0.062, 0.201) | -0.030<br>(-0.102, 0.230) | 0.070<br>(-0.074, 0.168) |

Numbers in each cell represent the net reclassification index for the indicated model comparison (by row) and outcome (by column), with 95% confidence intervals in parentheses.

Model 1 (Base model): Sex, race, BMI, baseline age and GFR

Model 2: Base model + genotype

Model 3: Base model + htTKV

Model 4: Base model + genotype + htTKV

**Supplemental Table S6.** Net reclassification indices for models that include ADPKD genotype and/or Irazabal class

| Model comparison    | Outcome                  |                          |                          |                          |                          |
|---------------------|--------------------------|--------------------------|--------------------------|--------------------------|--------------------------|
|                     | CKD Stage 3              | CKD Stage 4              | CKD Stage 5 or ESRD      | GFR decreased $\geq$ 30% | GFR decreased $\geq$ 57% |
| Model 2 vs. Model 1 | 0.004                    | 0.083                    | 0.079                    | 0.183                    | 0.109                    |
| Model 3 vs. Model 1 | 0.166<br>( 0.044, 0.474) | 0.334<br>( 0.125, 0.618) | 0.275<br>( 0.084, 0.628) | 0.302<br>( 0.108, 0.594) | 0.339<br>( 0.079, 0.546) |
| Model 4 vs. Model 1 | 0.234<br>( 0.093, 0.503) | 0.285<br>( 0.141, 0.629) | 0.329<br>( 0.095, 0.674) | 0.318<br>( 0.158, 0.675) | 0.290<br>( 0.114, 0.608) |
| Model 4 vs. Model 2 | 0.234<br>( 0.043, 0.425) | 0.182<br>( 0.068, 0.542) | 0.236<br>( 0.000, 0.495) | 0.226<br>( 0.016, 0.461) | 0.244<br>( 0.036, 0.473) |
| Model 4 vs. Model 3 | 0.032<br>(-0.072, 0.191) | 0.055<br>(-0.082, 0.224) | 0.071<br>(-0.093, 0.200) | 0.142<br>(-0.067, 0.280) | 0.031<br>(-0.069, 0.295) |

Numbers in each cell represent the net reclassification index for the indicated model comparison (by row) and outcome (by column), with 95% confidence intervals in parentheses.

Model 1 (Base model): Sex, race, BMI, baseline age and GFR

Model 2: Base model + genotype

Model 3: Base model + Irazabal class

Model 4: Base model + genotype + Irazabal class
